# Supplementary material for: E-Mental Health: A Rapid Review of the Literature
Source: Atypon-hosted journal article supplement (doi:10.1176/appi.ps.201300009), 2013-10-01
Supplement: 24_ds001.pdf [file 24_ds001.pdf]

## METHODOLOGY

### The rapid review method

The methods we used are similar to Khangura and colleagues' (10) seven-step process for conducting a rapid review: (1) identification of the research question in collaboration with the knowledge user, (2) development of the search strategy, (3) identification of relevant studies, (4) selecting studies, (5) conceptual mapping/identifying topical areas (6) charting information, and (7) collating, summarising, and reporting results. Results are reported using a combination of tables and narrative summaries.

### Search strategy and identification of relevant studies

The search focused on English, peer-reviewed full abstracts in Medline from 2005 to 2010 using the MESH terms 'mental disorders' and 'internet' and the following non-MESH key words: 'e-mental health', 'e-therapy', 'computer', 'computer-based therapy', 'computer-based treatment', 'web-based therapy', 'web-based treatment. We excluded search terms related to telehealth, given that this is a distinct, and well-established subset of the e-health field that mainly considers the use of telecommunications to connect service providers and patients across geographical distances (3) (as opposed to delivering automated, self-management interventions for example). The search was run in MEDLINE because of time constraints and because it is the most widely searched data base for health-related, has comprehensive coverage (more than 5500 journals), and has substantial overlap with other sources.

The initial search (December 2010) yielded 158 titles/abstracts. Similar keywords were also used in a brief on-line 'grey literature' search which retrieved additional relevant documents, such as a list of in-progress trials, a policy report, and recent conference proceedings. Two experts on e-mental health were also contacted by e-mail for comment on the appropriateness of the identified literature and additional articles. Final searches focused on the work of prominent authors (e.g., H. Christensen; I.B. Hickie; N. Titov). These latter search strategies yielded an additional 50 titles and abstracts. The search strategy and screening process are summarized in the flow diagram presented in Figure 1.

*Flow diagram of search and screening strategy*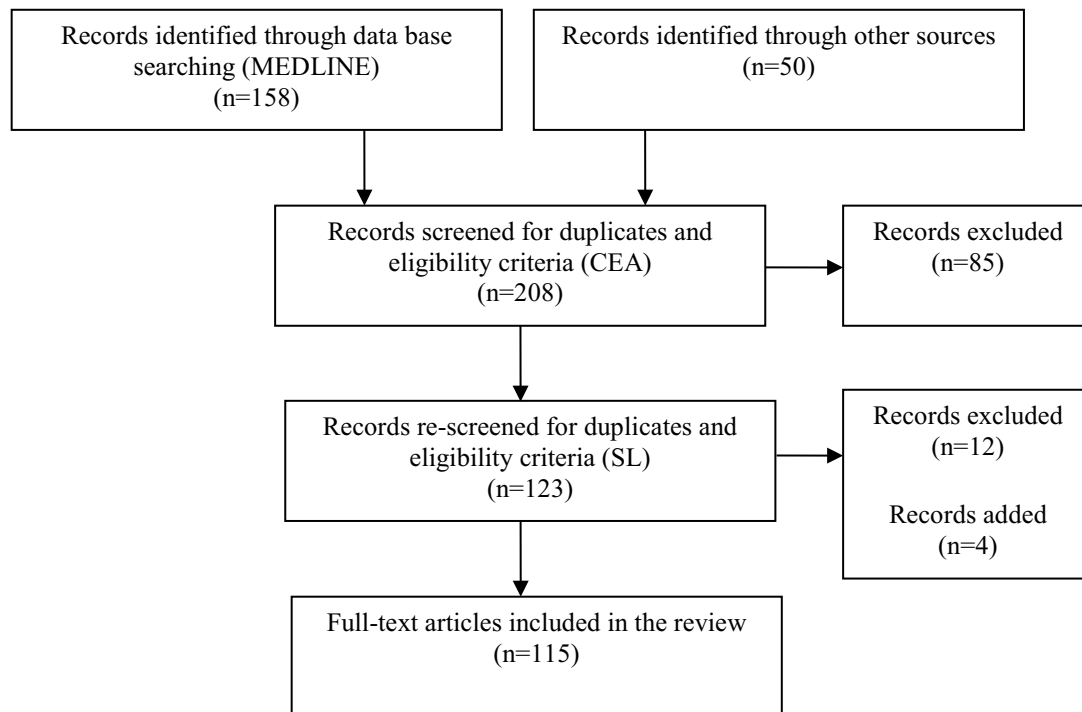

The 208 items were initially screened by CEA, using the following criteria: 1) the central focus of the article was e-mental health, rather than the subject just being mentioned in passing and 2) the article reported on interventions targeting individuals with mental health concerns or disorders including screening, access/referral, and treatment as an adjunct to, or independent of face-to-face service delivery. All types of papers (e.g., reviews, commentaries, descriptions of initiatives, and study designs) were included. Documents were excluded if they focussed on administrative or support of services (e.g., e-health records), professional training (e.g., on-line continuing education courses), and research support (e.g., study management or research evidence search tools). The screening left 123 documents for review and write-up. Later, this set of documents was reviewed by SL. At this point the relevancy of 12 items were questioned and removed based on discussion and consensus, and an additional 4 primary studies were identified. This left 115 documents for the validation review.

**Conceptual mapping, charting information, and reporting results**

A conceptual map of topic areas was developed for the review, based on the research questions and abstract content by CEA, and subsequently revised by SL during the validation stage, displayed in the figure below.

*Conceptual map of topic areas developed for the review*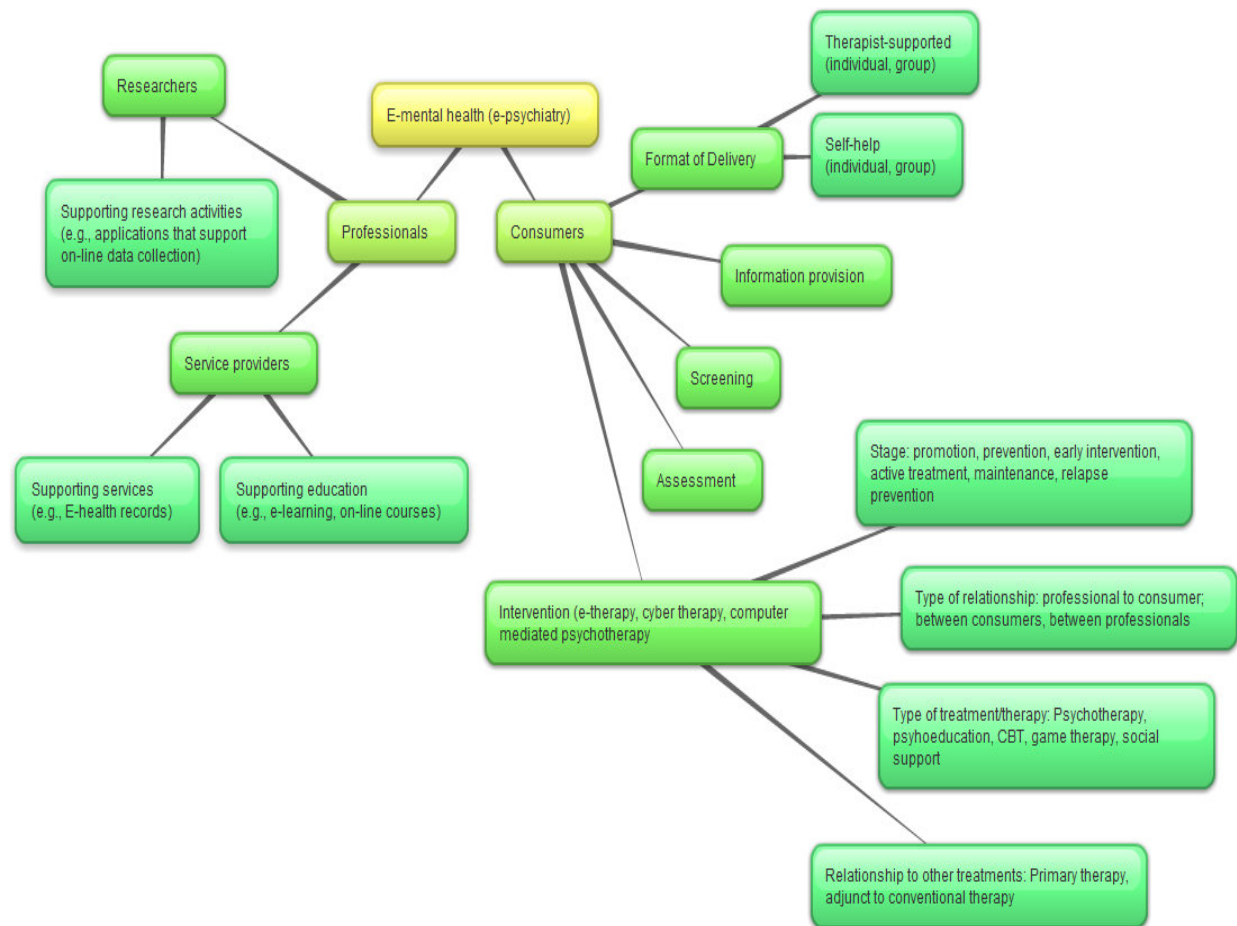

Documents were reviewed for each topic area and key points were extracted for each research question and then written up. A list of all e-mental health initiatives described in the materials was also prepared (see table below). In the validation step, SL read the full set of materials, critically compared the information with the major points and conclusions of the original review, and reviewed the tabulated examples. In addition, key characteristics from the selected documents (e.g. date, country of origin, type of document) were extracted to describe the body of literature reviewed.

**Examples of e-mental health programs and initiatives\***

\* inclusion in this list is not meant to imply endorsement or confirmation of effectiveness

| <b>Type of Initiative</b>                                            | <b>Target Condition(s)</b>                                                                              | <b>Target Population (s)</b> | <b>Function</b>                                                     | <b>Components and Technologies Used</b>                                                                                                      | <b>Reference and Country</b> |
|----------------------------------------------------------------------|---------------------------------------------------------------------------------------------------------|------------------------------|---------------------------------------------------------------------|----------------------------------------------------------------------------------------------------------------------------------------------|------------------------------|
| Computer-based program                                               | Mild cognitive impairment/ memory disorders                                                             | Older adults and elderly     | Cognitive training                                                  | Home based computers                                                                                                                         | (73)<br>(US)                 |
| Computerized adaptive test                                           | Anxiety                                                                                                 | Adults                       | Patient reported outcomes                                           | Personal digital assistants                                                                                                                  | (14)<br>(Germany)            |
| Web-based service: 'e-hub'<br>-bluepages<br>-MoodGYM<br>-e-couch     | Common mental health concerns                                                                           | General public               | Self-help prevention, early intervention, and treatment (CBT-based) | CBT program, bulletin board, email consultation, information                                                                                 | (27)<br>(Australia)          |
| Web-based program                                                    | Panic disorder with or w/o agoraphobia                                                                  | Adults                       | Self-help treatment (CBT-based) and peer support                    | Self-help modules via web pages; access to psychologist feedback; online discussion forum with patients                                      | (22)<br>(Sweden)             |
| Website with various resources<br>'Reach Out'<br>'Reach Out Central' | Mental health promotion and stigma reduction (development of coping skills to deal with life stressors) | Adolescents and young adults | Information, social support, CBT treatment                          | Evidence-based factsheets; moderated community forum; gaming; links to social networking sites; podcasts                                     | (28,29,74)<br>(Australia)    |
| Computer-based program                                               | Addiction                                                                                               | Adults                       | Self-help treatment (CBT-based)                                     | Computer-based program accessed in clinic consisting of elementary-level computer learning games; presentation of material using multi-media | (75)<br>(US)                 |
| Computer-based program                                               | Serious mental illness                                                                                  | Adults (outpatient setting)  | Self-assessment before clinic appointment                           | Computer-based program, touch screen monitor, printed summary of results                                                                     | (15)<br>(US)                 |
| Web-based programs and sites<br>-MoodGym                             | Depression                                                                                              | Youth<br>Adults              | Self-help treatment (CBT-based); and psychoeducatio                 | Web-pages (BluePages)<br>Interactive modules (MoodGYM)                                                                                       | (31–33)<br>(Australia)       |

## DIGITAL SUPPLEMENT

| <b>Type of Initiative</b>               | <b>Target Condition(s)</b>                                                           | <b>Target Population (s)</b>                   | <b>Function</b>                                                                                              | <b>Components and Technologies Used</b>                                                                                                                            | <b>Reference and Country</b> |
|-----------------------------------------|--------------------------------------------------------------------------------------|------------------------------------------------|--------------------------------------------------------------------------------------------------------------|--------------------------------------------------------------------------------------------------------------------------------------------------------------------|------------------------------|
| (CBT)<br>-Bluepages<br>(website)        |                                                                                      |                                                | n website                                                                                                    |                                                                                                                                                                    |                              |
| Web-based service<br>'Veterans Chat'    | Suicide                                                                              | Adults<br>(veterans)                           | Prevention                                                                                                   | Chat communication technology accessible by dial-up                                                                                                                | (76)<br>(US)                 |
| Web-based program                       | Anxiety and depression                                                               | Young adults                                   | Early intervention/<br>educational program based on cognitive behavioural analysis principles                | Web-based program supplemented with printed materials, worksheets, email summaries                                                                                 | (77)<br>(US)                 |
| Web-based application<br>'CommonGround' | Serious mental illness                                                               | Adults<br>(outpatient setting)                 | Decision making in relation to medication management                                                         | Web-based software application including survey, database, library, reports, and personal data; combined with peer-run Decision Support Center in the waiting area | (78,79)<br>(US)              |
| Web-based Program                       | Mental health issues in youth                                                        | Parents                                        | Prevention and early intervention, knowledge and skills development related to mental health issues in youth | Web-based program, multimedia based interactive modules                                                                                                            | (80)<br>(US)                 |
| Web-based symptom questionnaire         | Depression, suicide risk, anxiety, PTSD                                              | Adolescents and young adults<br>(primary care) | Screening/<br>assessment                                                                                     | Web-based interactive application                                                                                                                                  | (16)<br>(US)                 |
| Web-based symptom questionnaire         | Depression, substance abuse, anxiety, PTSD, various phobias, panic disorder, and OCD | Adults<br>(mental health care)                 | Screening/<br>assessment                                                                                     | Web-based instrument                                                                                                                                               | (17)<br>(Netherlands)        |

## DIGITAL SUPPLEMENT

| Type of Initiative                                         | Target Condition(s)                                                | Target Population (s)         | Function                                                    | Components and Technologies Used                                                                                 | Reference and Country |
|------------------------------------------------------------|--------------------------------------------------------------------|-------------------------------|-------------------------------------------------------------|------------------------------------------------------------------------------------------------------------------|-----------------------|
| Electronic symptom questionnaire                           | Depression and alcohol abuse                                       | Adults (rural primary care)   | Screening/assessment                                        | Portable computerized touch screen device                                                                        | (30) (US)             |
| Web-based support                                          | Mental health problems                                             | College students              | Information; peer support                                   | Website; electronic bulletin board                                                                               | (81) (UK)             |
| Web-based program                                          | Mental disorders                                                   | Adults                        | Group therapy                                               | Group therapy delivered through web-based chat room                                                              | (82) (Germany)        |
| Web-based program                                          | Neurodevelopmental and neuropsychiatric disorders                  | Children                      | Monitoring pharmaceutical interventions in child psychiatry | Web-based symptom monitoring system                                                                              | (18) (UK)             |
| Web-based symptom questionnaire 'Neuropsych Questionnaire' | Neuropsychiatric disorders                                         | Adults and Children           | Screening/assessment                                        | Web-based instrument                                                                                             | (19) (US)             |
| Web-based, mobile interventions                            | Substance use, anxiety, eating disorders, and lifestyle management | Adults                        | Monitoring                                                  | Web-based mobile technology                                                                                      | (20) (US)             |
| Website 'DoctorsHealth'                                    | Mental health problems                                             | Physicians and their families | Information and resources                                   | Website with information on mental health resources                                                              | (83) (Australia)      |
| Overcoming Depression on the InterNet                      | Depression                                                         | Adults                        | Self-help treatment                                         | Self-help website plus telephone and/or postcard reminders to use the website                                    | (84) (US)             |
| CopingMatters                                              | Substance Abuse                                                    | Low-moderate risk drinkers    | Prevention/early intervention/harm reduction                | Self-assessment; individualized feedback; information; workshops; journal; interactive forum; links to resources | (85) (US)             |
| Web-based CBT                                              | Depression                                                         | Adults (primary care)         | CBT treatment delivered by therapist                        | On-line free texting                                                                                             | (86) (UK)             |
| Web-based                                                  | Anxiety                                                            | Children and                  | Self-help treatment (CBT-                                   | CD-ROM (Cool Teens); computer based program                                                                      | (23,24)               |

# DIGITAL SUPPLEMENT

| Type of Initiative                                           | Target Condition(s)                                                      | Target Population (s)  | Function                                                | Components and Technologies Used                                                                             | Reference and Country |
|--------------------------------------------------------------|--------------------------------------------------------------------------|------------------------|---------------------------------------------------------|--------------------------------------------------------------------------------------------------------------|-----------------------|
| program<br>'Camp Cope-A-Lot: The Coping Cat'<br>'Cool Teens' | Disorders                                                                | adolescents            | based) with parent/ therapist support                   | (Coping Cat); flash animation, multimedia, cartoon characters; video game rewards; parent/therapist assisted | (US)                  |
| Web-based program                                            | Panic disorder                                                           | Adults                 | Self-assessment and self-help                           | Self-assessment; feedback; information; coping strategies                                                    | (87)<br>(Australia)   |
| Web-based program<br>-PTSD Online                            | PTSD                                                                     | Adults                 | Self-help treatment w/ therapist assistance (CBT-based) | Module based self-treatment with email support from psychologist                                             | (88)<br>(Australia)   |
| Web-based program                                            | Social Phobia                                                            | Adults                 | Automated CBT program                                   | Virtual reality therapy interventions directed by a cognitive behaviour therapist                            | (89)<br>(France)      |
| Website<br>-Glaukopis-net                                    | Range of psychiatric conditions (e.g., dementia, depression and anxiety) | Adults                 | Information and email consultation                      | Website with information, and services delivered thru email                                                  | (6)<br>(Greece)       |
| Web-based program<br>-interapy.nl                            | PTSD                                                                     | Adults                 | Treatment                                               | Writing sessions with therapist feedback; psychoeducation                                                    | (90)<br>(Netherlands) |
| Web-based symptom questionnaire                              | Depressive symptoms and Major Depressive Disorder                        | Adults                 | Self-screening/ assessment                              | Web-based self-assessment tool                                                                               | (91)<br>(Taiwan)      |
| Web-based program<br>-Down your Drink                        | Alcohol abuse                                                            | Adults                 | Screening, prevention, harm reduction                   | Web-based interactive program with self-assessment, feedback, and brief interventions                        | (92)<br>(UK)          |
| Web-based program<br>-Beating the Blues                      | Mild to moderate Anxiety and Depression                                  | Adults in primary care | Self-help treatment (CBT-based)                         | Introductory video; CBT sessions; progress reports for general practitioners and nurses retrieved from the   | (93)<br>(UK)          |

# DIGITAL SUPPLEMENT

| Type of Initiative                                                        | Target Condition(s)                                    | Target Population (s)                          | Function                                                | Components and Technologies Used                                                                                                   | Reference and Country                                 |
|---------------------------------------------------------------------------|--------------------------------------------------------|------------------------------------------------|---------------------------------------------------------|------------------------------------------------------------------------------------------------------------------------------------|-------------------------------------------------------|
|                                                                           |                                                        |                                                |                                                         | system                                                                                                                             |                                                       |
| Computer-based program<br>-SPARX                                          | Depression                                             | Adolescents                                    | Self-help treatment                                     | Self-help interactive fantasy game delivered on CD-ROM                                                                             | (Merry, 2010-<br>personal comm.)<br><br>(New Zealand) |
| Web-based program<br>-Sadness                                             | Depression                                             | Adults                                         | Self-help treatment with therapist support (CBT-based)  | Online lessons, homework assignments, online discussion forum with therapist moderating, and email contact/feedback from therapist | (94)<br>(Australia)                                   |
| Web-based assessment                                                      | Care recipients                                        | Adults                                         | Assessment                                              | Electronic diaries operated thru mobile technologies, PDA's, interactive voice response systems                                    | (95)<br>(US)                                          |
| Computer-based program<br>-Captain's Log<br>-Destination Reading and Math | Attention problems                                     | Children                                       | Cognitive training                                      | Computer-based exercises                                                                                                           | (96)<br>(US)                                          |
| Web-based program<br>-SHUTi                                               | Insomnia                                               | Adults                                         | Self-help treatment (CBT-based)                         | Interactive web-based program including vignettes, quizzes, brief games, automated e-mail reminders and prompts                    | (97)<br>(US)                                          |
| Web-based program<br>-SOAR                                                | Schizophrenia                                          | Adults with schizophrenia and their caregivers | Multi-family psychoeducation (problem solving approach) | Web-based tutorials, self-help articles, and group forums.                                                                         | (26) (US)                                             |
| Web-based program                                                         | PTSD/panic, depression, GAD, alcohol and substance use | Adults (affected by disasters)                 | Self-help intervention                                  | Modular based self-help                                                                                                            | (98)<br>(US)                                          |
| School-based website                                                      | Various health and                                     | Youth (middle and                              | Health promotion and                                    | Website containing information sheets, posting                                                                                     | (12)                                                  |

## DIGITAL SUPPLEMENT

| Type of Initiative                             | Target Condition(s)                            | Target Population (s)                          | Function                                            | Components and Technologies Used                                                                                                                                                | Reference and Country  |
|------------------------------------------------|------------------------------------------------|------------------------------------------------|-----------------------------------------------------|---------------------------------------------------------------------------------------------------------------------------------------------------------------------------------|------------------------|
| -YooMagazine                                   | psychosocial needs                             | high school aged)                              | Early detection                                     | and responding to questions                                                                                                                                                     | (Canada)               |
| Web-based bulletin board                       | Parenting stress                               | Parents of children with mental illness        | Social support                                      | Bulletin board                                                                                                                                                                  | (25)<br>(US)           |
| Web-based program                              | Sub-threshold depression                       | Adults 50+                                     | Self-help intervention (CBT-based)                  | Modular web-based program with text, exercises, videos, and figures with possibility to call center for assistance                                                              | (21)<br>(Netherlands)  |
| Program partially delivered via clinic and web | Anxiety Disorders                              | Children and youth aged 7-14 and their parents | Self-help and treatment (CBT-based)                 | Clinic based treatment combined with internet based delivery; color, animations, sounds, roll-over images, pop-up messages, and self-assessment quizzes with immediate feedback | (99)<br>(Australia)    |
| Web-based Program                              | Social Phobia and public speaking fears        | Adults (university students)                   | Self-help treatment                                 | Web-based modules consisting of information, exercises, essay questions, online discussion; homework assignments with therapist feedback                                        | (34)<br>(Sweden)       |
| Web-based program<br>-Shyness                  | Social phobia                                  | Adults                                         | Self-help treatment (CBT-based), clinician-assisted | Web-based, online lessons, homework assignments, online discussion forum, and email contact with therapist                                                                      | (100)<br>(Australia)   |
| Web-based self-help program                    | Mild to moderate suicidal thoughts, depression | Adults                                         | Self-help treatment (CBT-based)                     | Web-based modular program with information, exercises, assignments, and section on 'frequently asked questions,' with opportunities to pose questions to this section           | (101)<br>(Netherlands) |
| Web-based program<br>-Project Catch-it         | Depression                                     | Adolescents in primary care                    | Prevention                                          | Web-based modular program (including a workbook for parents), combined with physician delivered motivational interviewing or brief advice                                       | (102)<br>(US)          |
| Web-based                                      | Panic disorder                                 | Adults                                         | Self-help                                           | Web-based program                                                                                                                                                               | (103)                  |

## DIGITAL SUPPLEMENT

| <b>Type of Initiative</b>                    | <b>Target Condition(s)</b>             | <b>Target Population (s)</b>                   | <b>Function</b>                                            | <b>Components and Technologies Used</b>                                                                                                                    | <b>Reference and Country</b> |
|----------------------------------------------|----------------------------------------|------------------------------------------------|------------------------------------------------------------|------------------------------------------------------------------------------------------------------------------------------------------------------------|------------------------------|
| program                                      | with or without agoraphobia            |                                                | treatment (CBT-based) supported by clinician               | consisting of lessons, assignments, email contact with clinician, moderated online discussion forum                                                        | (Australia)                  |
| Web-based program and website<br>-Kopstoring | Behavioural and psychological problems | Adolescents (16-25) of parents with MI or SUDS | Group-based prevention program (coping skills development) | Web-based chat room for delivery of structured group intervention; program is integrated in a website that includes other e-mail services and chat options | (70)<br>(Netherlands)        |
